# Supplementary material
Source: Copernicus journal article supplement (doi:10.5194/egusphere-2026-721)
Supplement: Supplementary file 1 [file egusphere-2026-721-supplement.pdf]

Supplementary File

**Historical and Projected Changes in Temperature–Precipitation Compound Hot and Dry Extremes across Africa Based on CMIP5 and CMIP6 Ensemble Simulations**

Paul Adigun <sup>1</sup>; Koji Dairaku <sup>1</sup>; Akinwale T. Ogunrinde <sup>2,\*</sup>; Ebiendele Precious <sup>1</sup>; Muhammad Umar Nadeem <sup>1</sup>; Ermias Sisay Brhane <sup>1</sup>; Xian Xue <sup>1</sup>

<sup>1</sup> *Department of Engineering Mechanics and Energy, University of Tsukuba, 3F300 Tennodai 1-1-1, Tsukuba, 305-8573, Japan.*

<sup>2</sup> *Key Laboratory of Ecological Safety and Sustainable Development in Arid Lands, Northwest Institute of Eco-Environment and Resources, Chinese Academy of Sciences, Lanzhou, Gansu, China*

\* Corresponding author: [ogunrindeakinwale@nieer.ac.cn](mailto:ogunrindeakinwale@nieer.ac.cn)

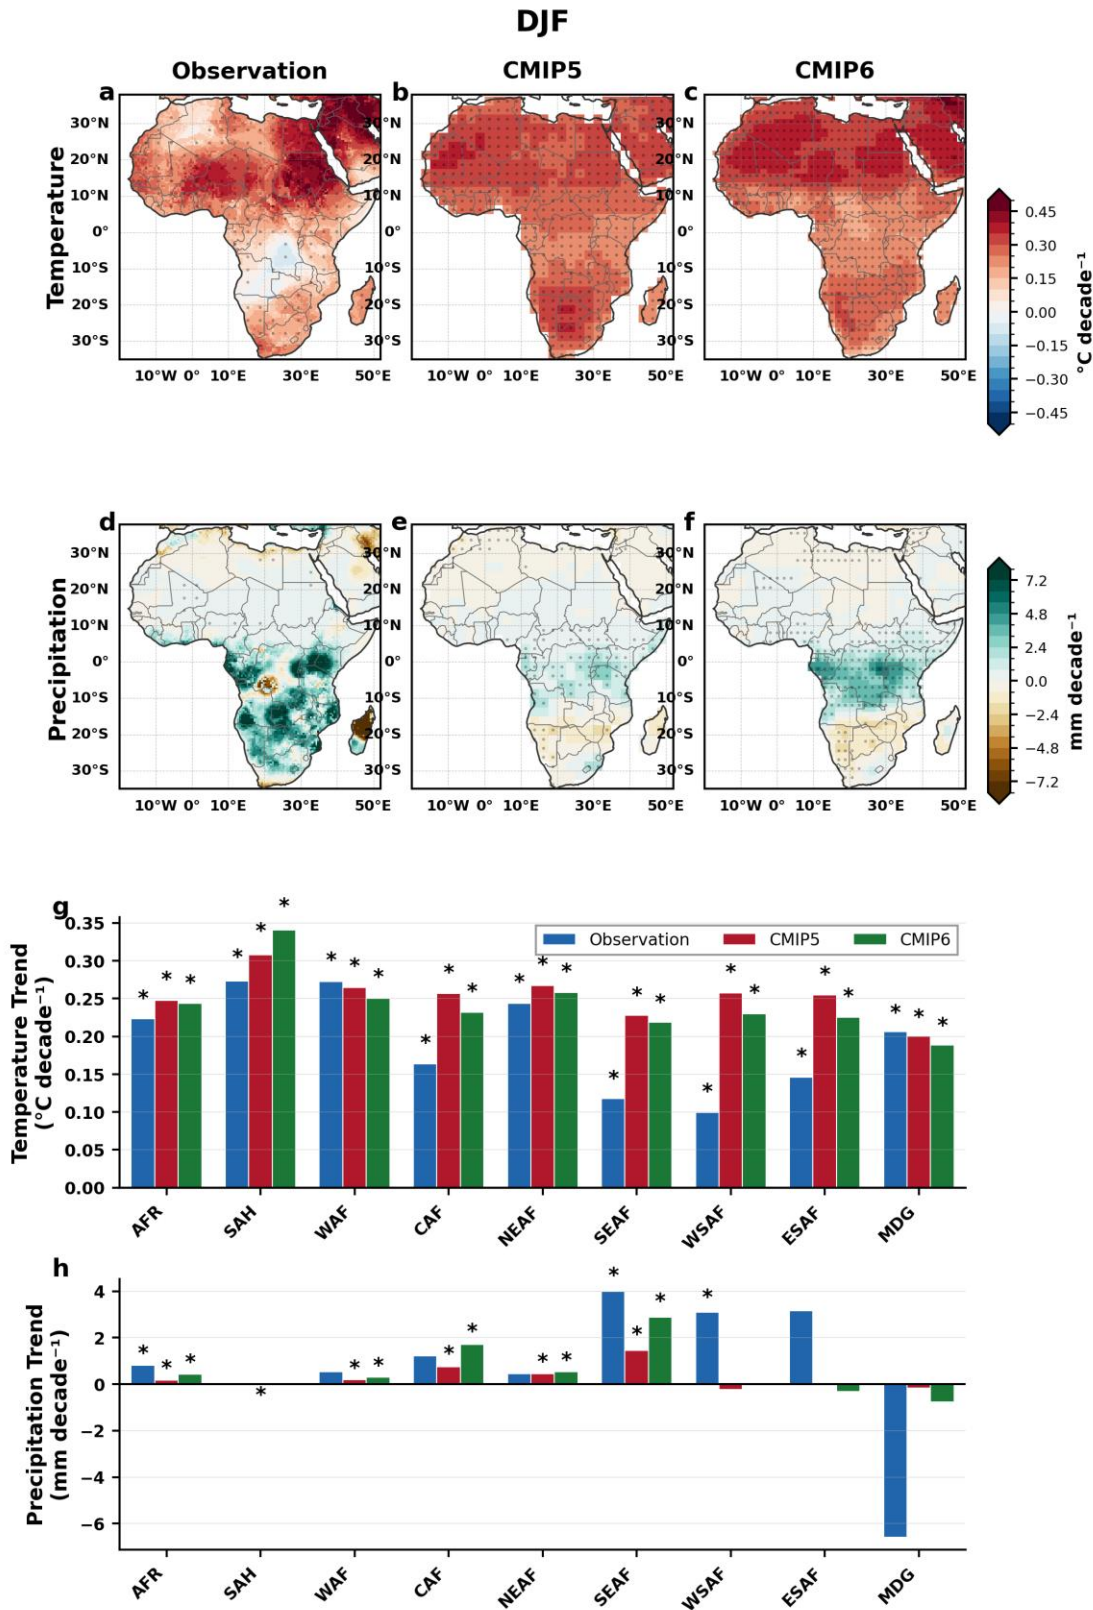

Figure S1: Seasonal temperature and precipitation trends for DJF (December–January–February), 1980–2020. Layout as in Fig. 1. DJF represents the boreal winter and austral summer season. Notable features include enhanced warming over West Africa and the Sahara ( $0.27\text{--}0.34\text{ }^{\circ}\text{C decade}^{-1}$ ), strong observed wetting in southeastern Africa ( $3.99\text{ mm decade}^{-1}$ ), and pronounced drying over Madagascar ( $-6.59\text{ mm decade}^{-1}$ )

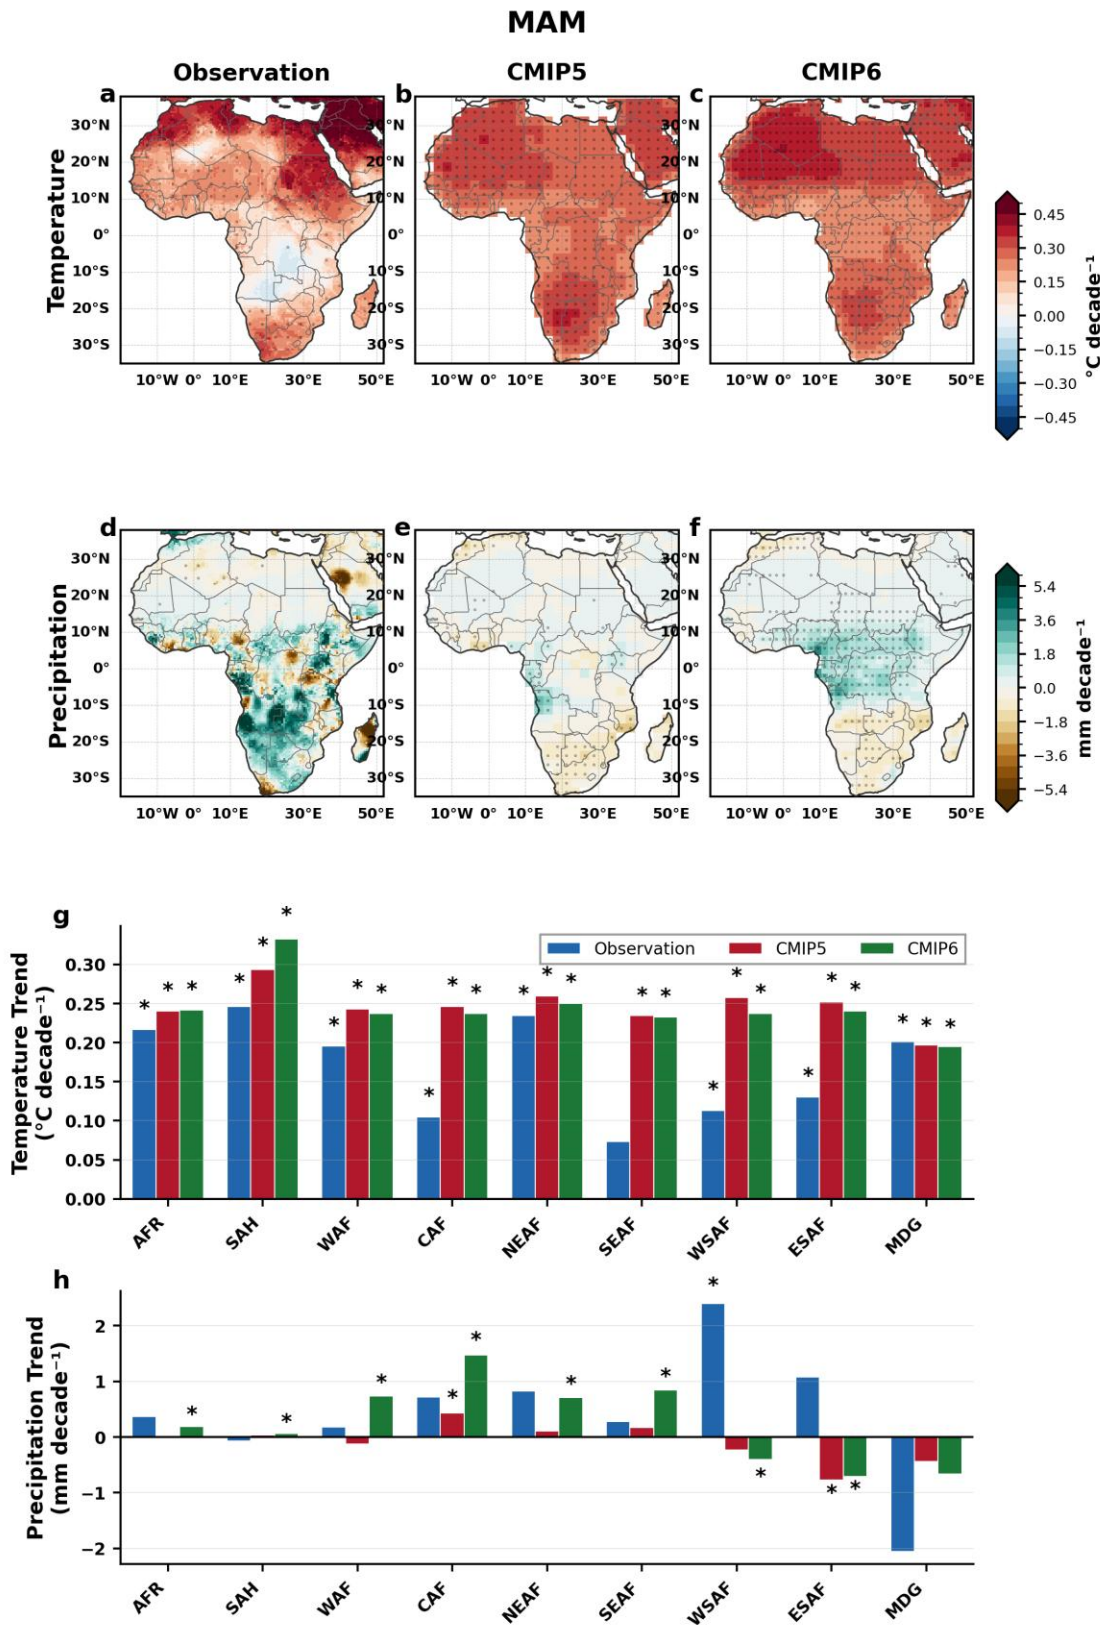

Figure S2: Seasonal temperature and precipitation trends for MAM (March–April–May), 1980–2020. Layout as in Fig. 1. MAM represents the boreal spring transition season. Southeast Africa shows the weakest observed warming ( $0.07^{\circ}\text{C decade}^{-1}$ , not significant), while western southern Africa exhibits significant observed wetting ( $2.40 \text{ mm decade}^{-1}$ ) that contrasts with model-simulated drying.

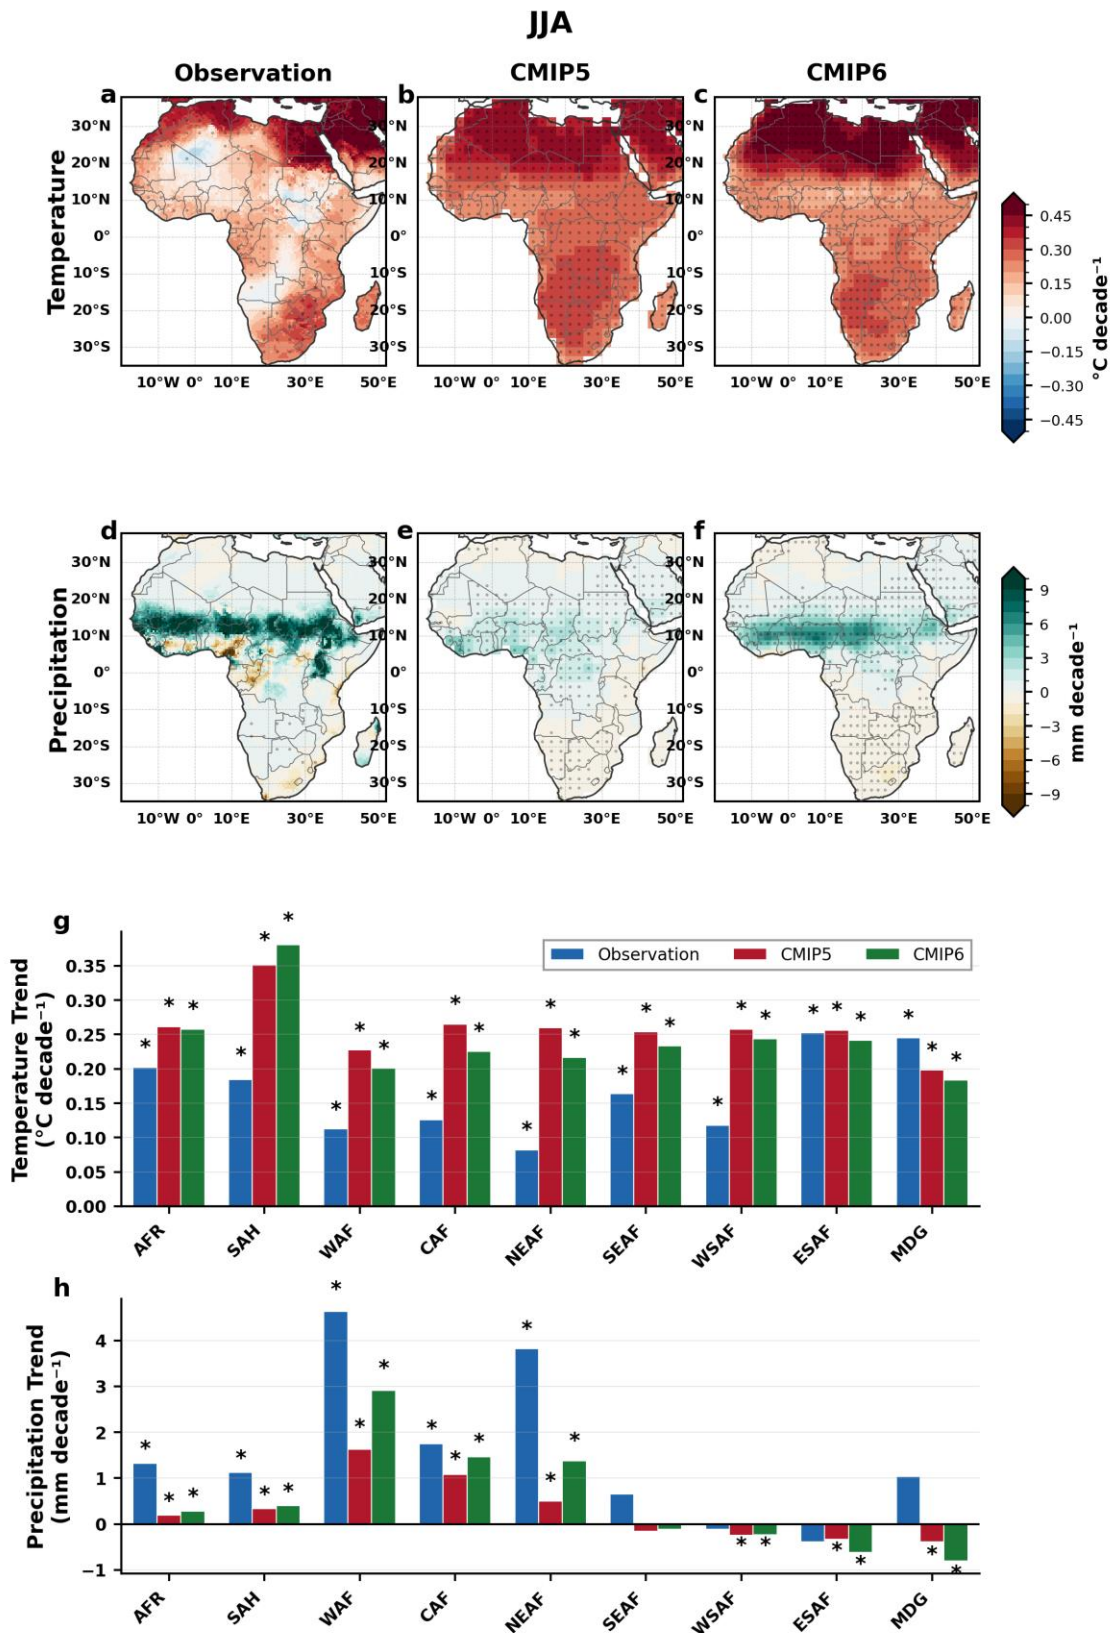

Figure S3: Seasonal temperature and precipitation trends for JJA (June–July–August), 1980–2020. Layout as in Fig. 1. JJA represents the West African monsoon season. Observed precipitation trends peak in West Africa (4.63 mm decade<sup>-1</sup>) and Northeast Africa (3.82 mmdecade<sup>-1</sup>), while the Sahara exhibits maximum warming in models (0.35–0.38°C decade<sup>-1</sup>).

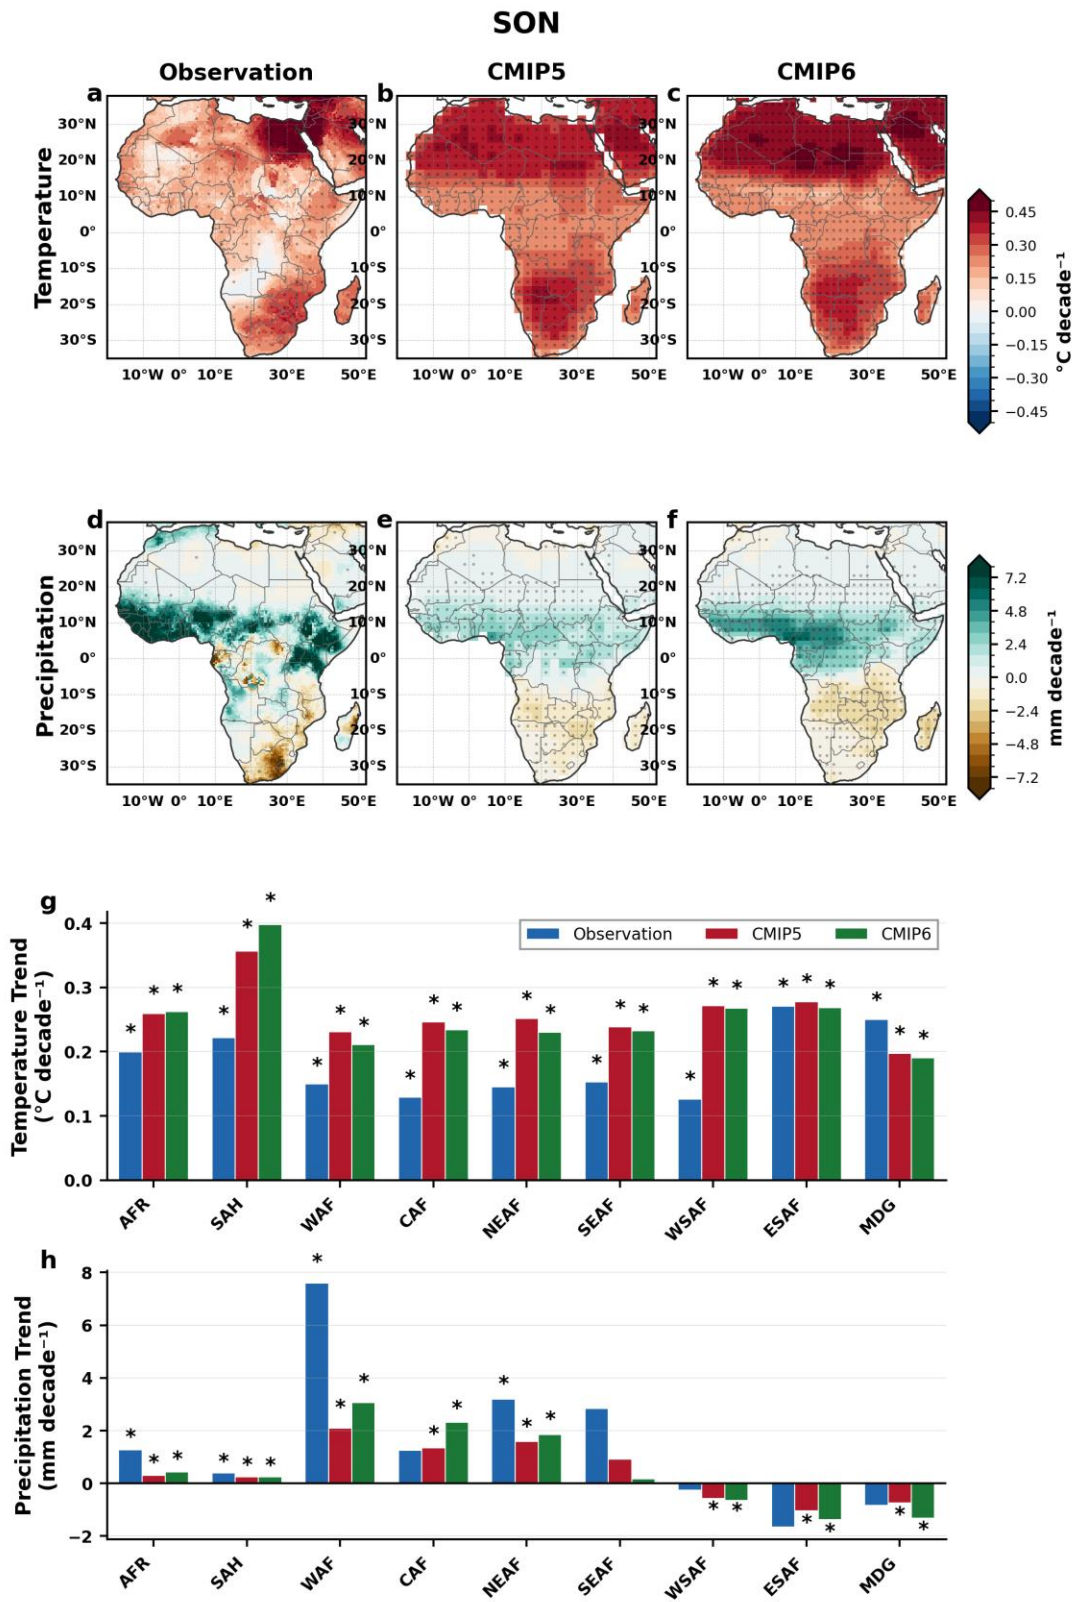

**Figure S4: Seasonal temperature and precipitation trends for SON (September–October–November), 1980–2020.** Layout as in Fig. 1. SON represents the late monsoon retreat and short rains season. West Africa shows the strongest observed precipitation trends of any season ( $7.60 \text{ mm decade}^{-1}$ ), while the Sahara exhibits maximum modelled warming ( $0.36\text{--}0.40 \text{ °C decade}^{-1}$ ). Southern African drying signals are most coherent during this season.

DJF

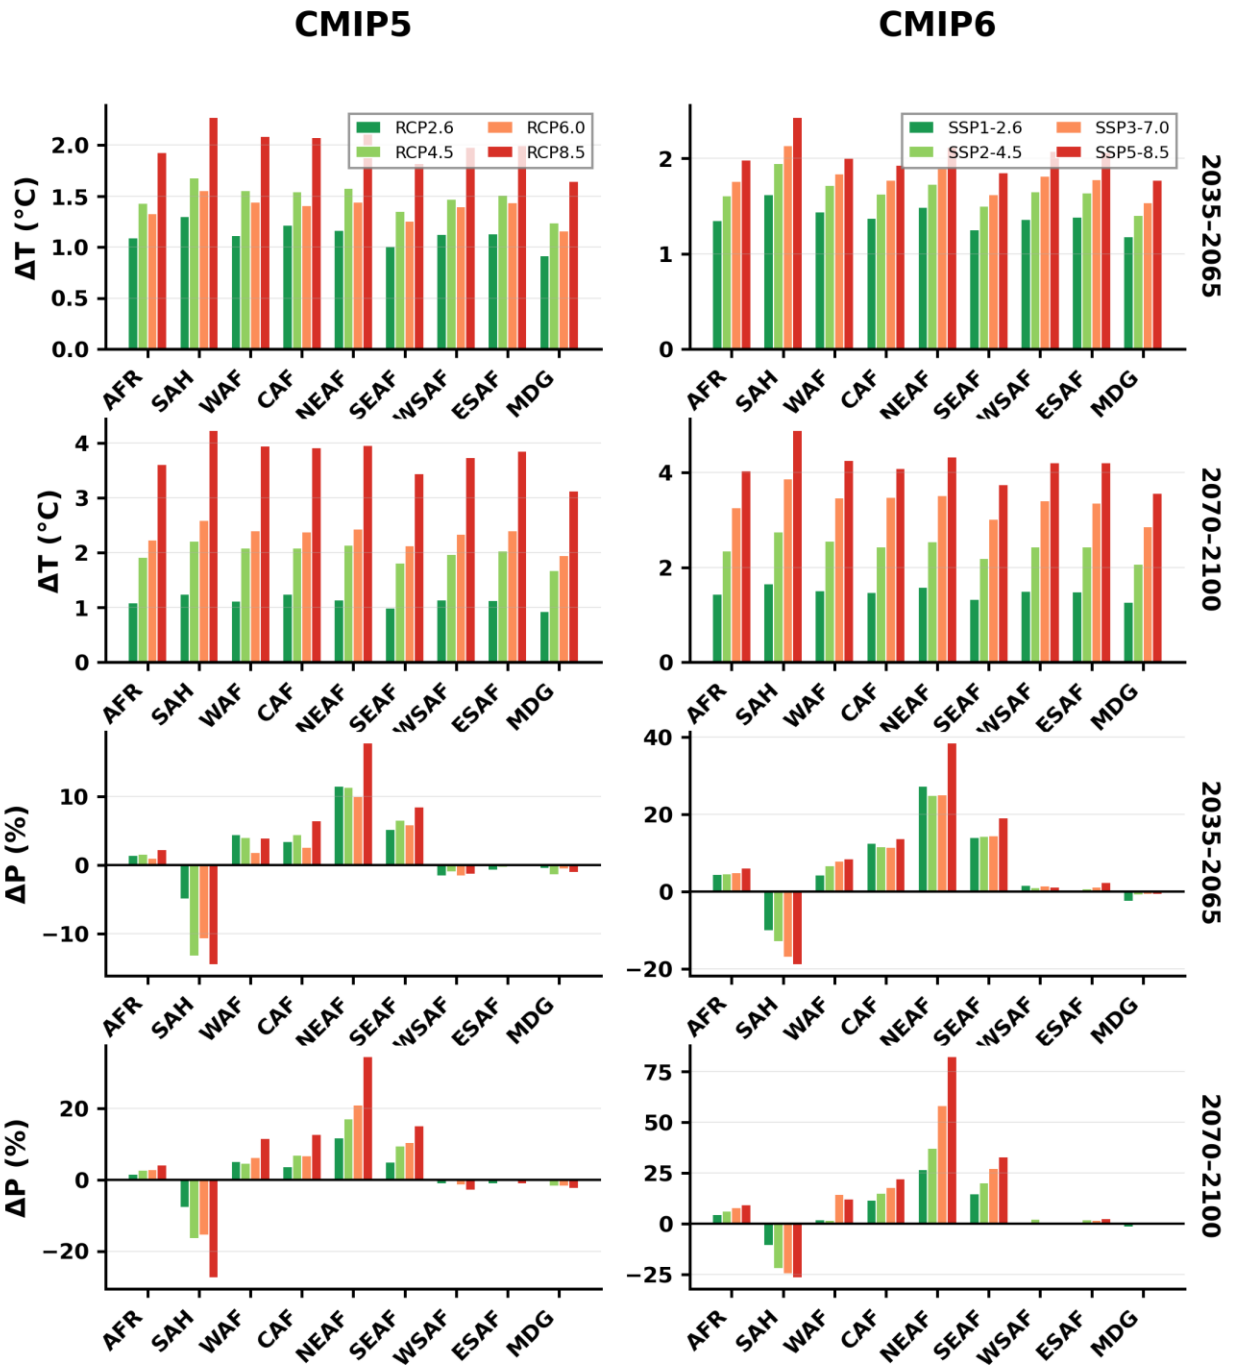

Figure S5: Projected regional mean temperature and precipitation changes across African IPCC reference regions under CMIP5 and CMIP6 emission scenarios for the DJF season. Layout as in Figure 2.

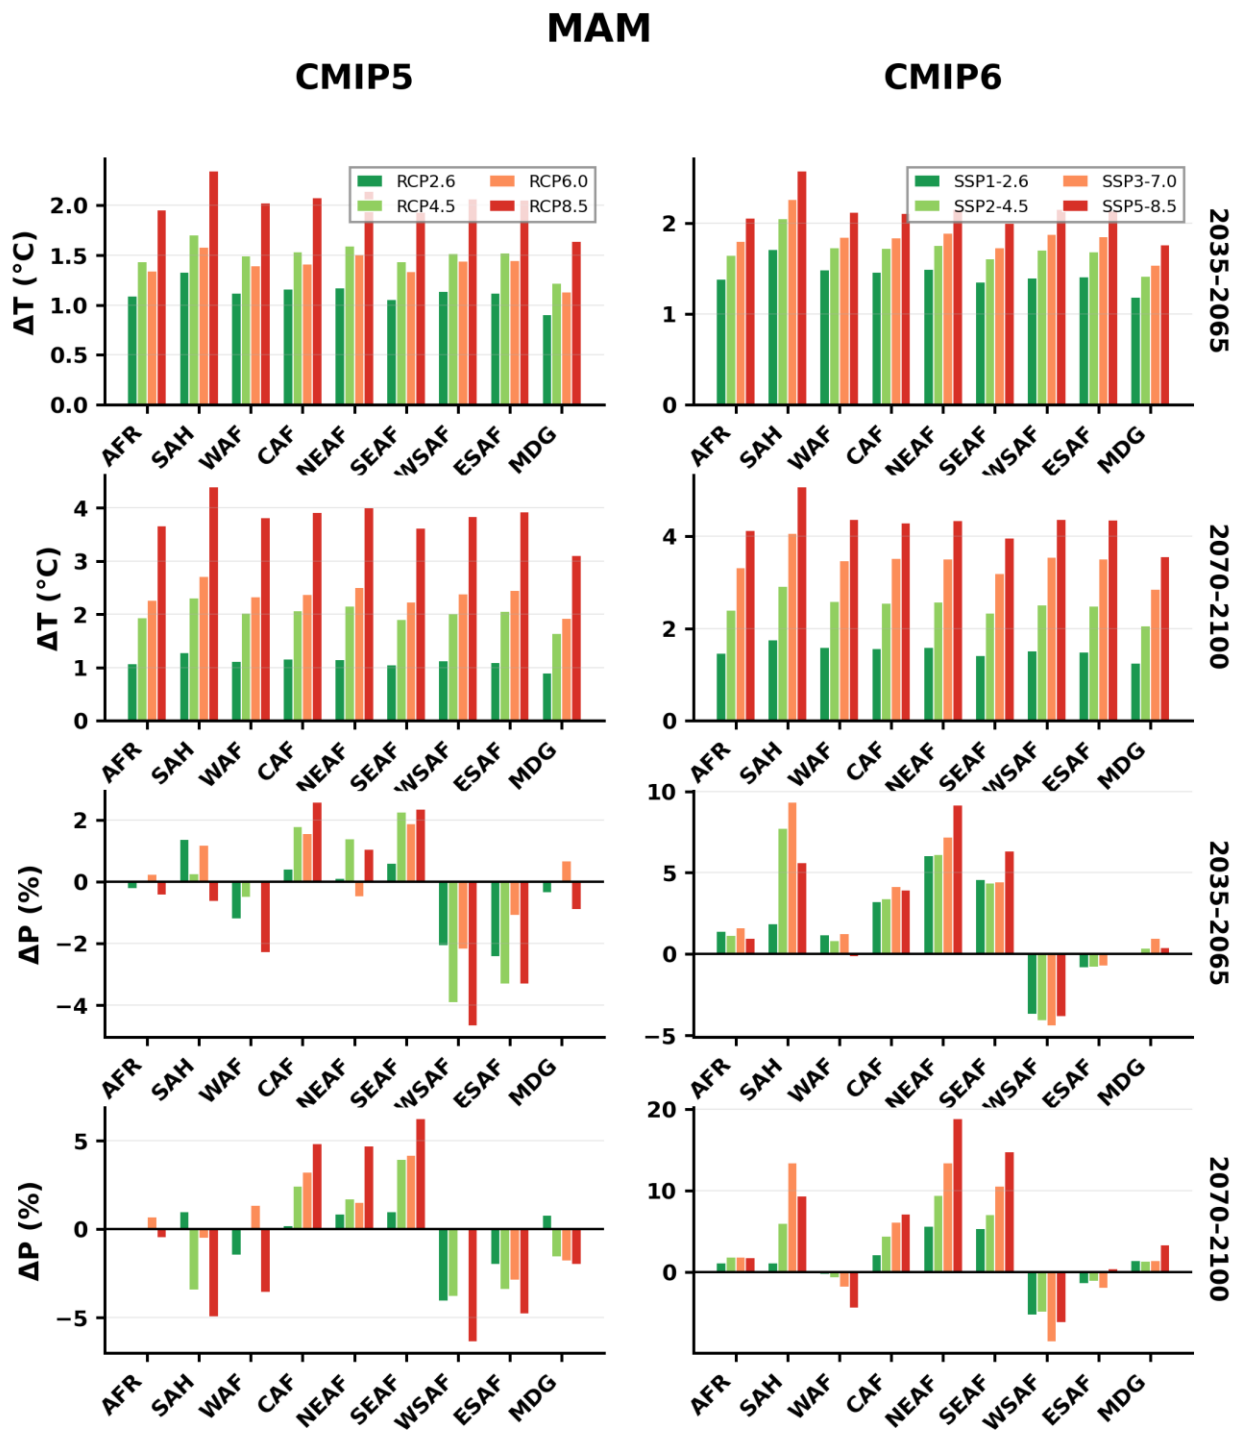

Figure S6: Projected regional mean temperature and precipitation changes across African IPCC reference regions under CMIP5 and CMIP6 emission scenarios for the MAM season. Layout as in Figure 2.

JJA

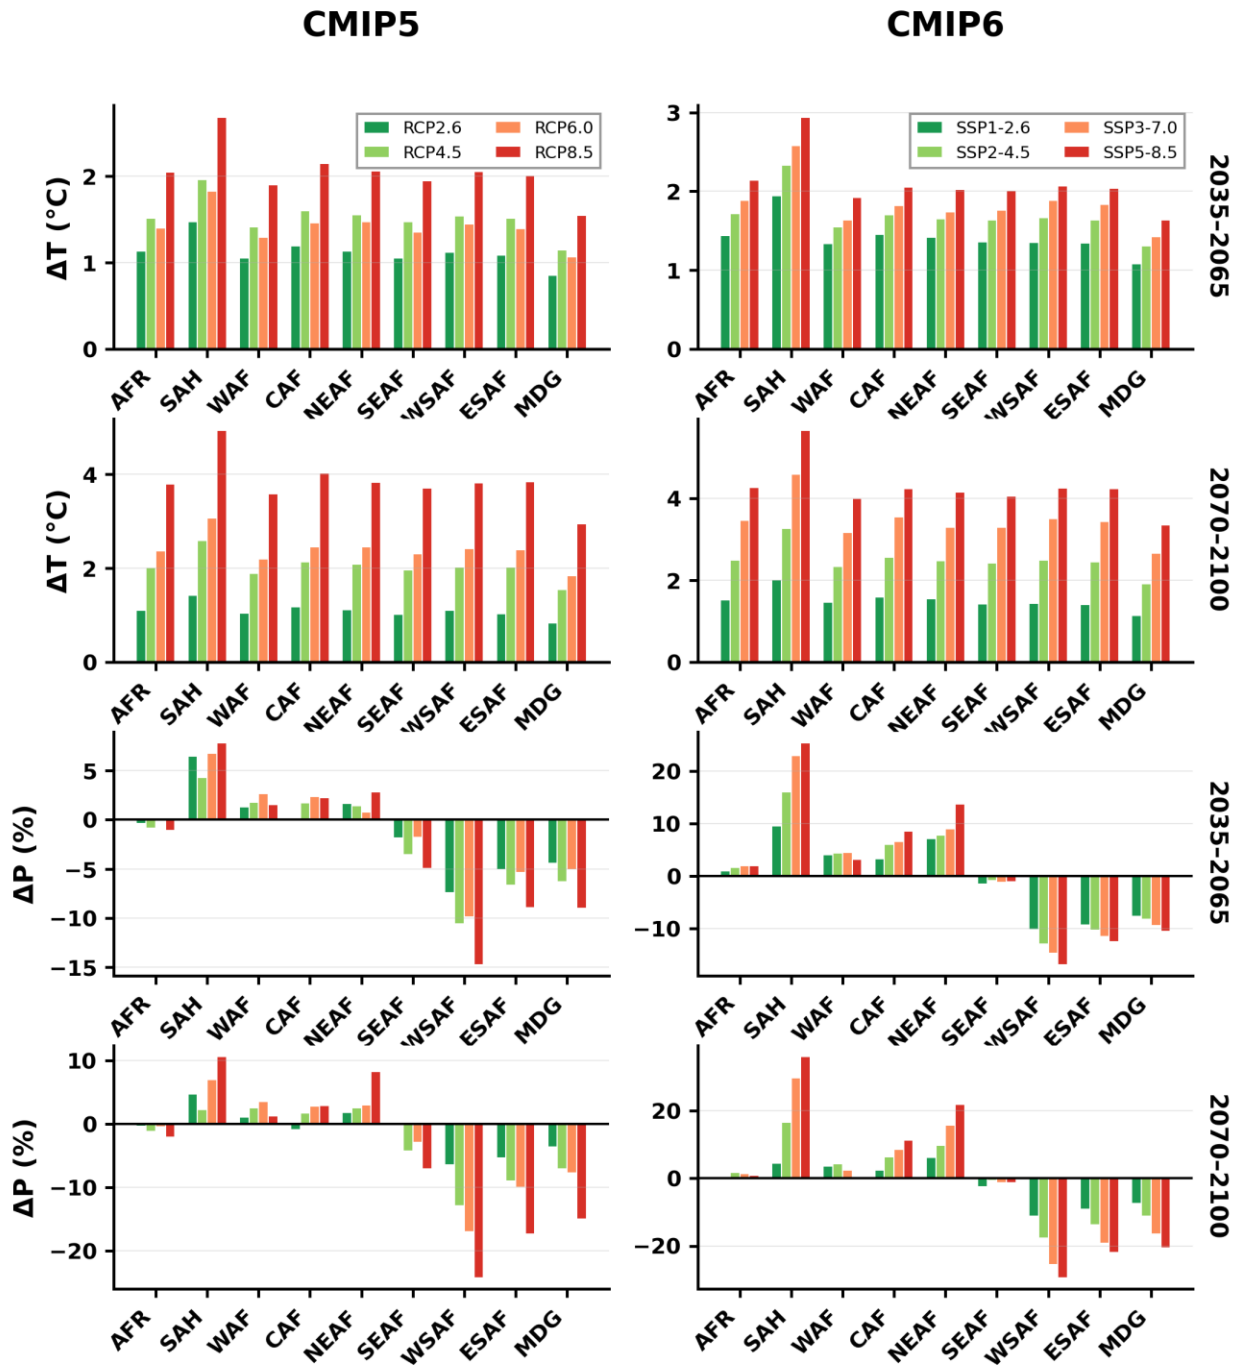

Figure S7: Projected regional mean temperature and precipitation changes across African IPCC reference regions under CMIP5 and CMIP6 emission scenarios for the JJA season. Layout as in Figure 2.

# SON

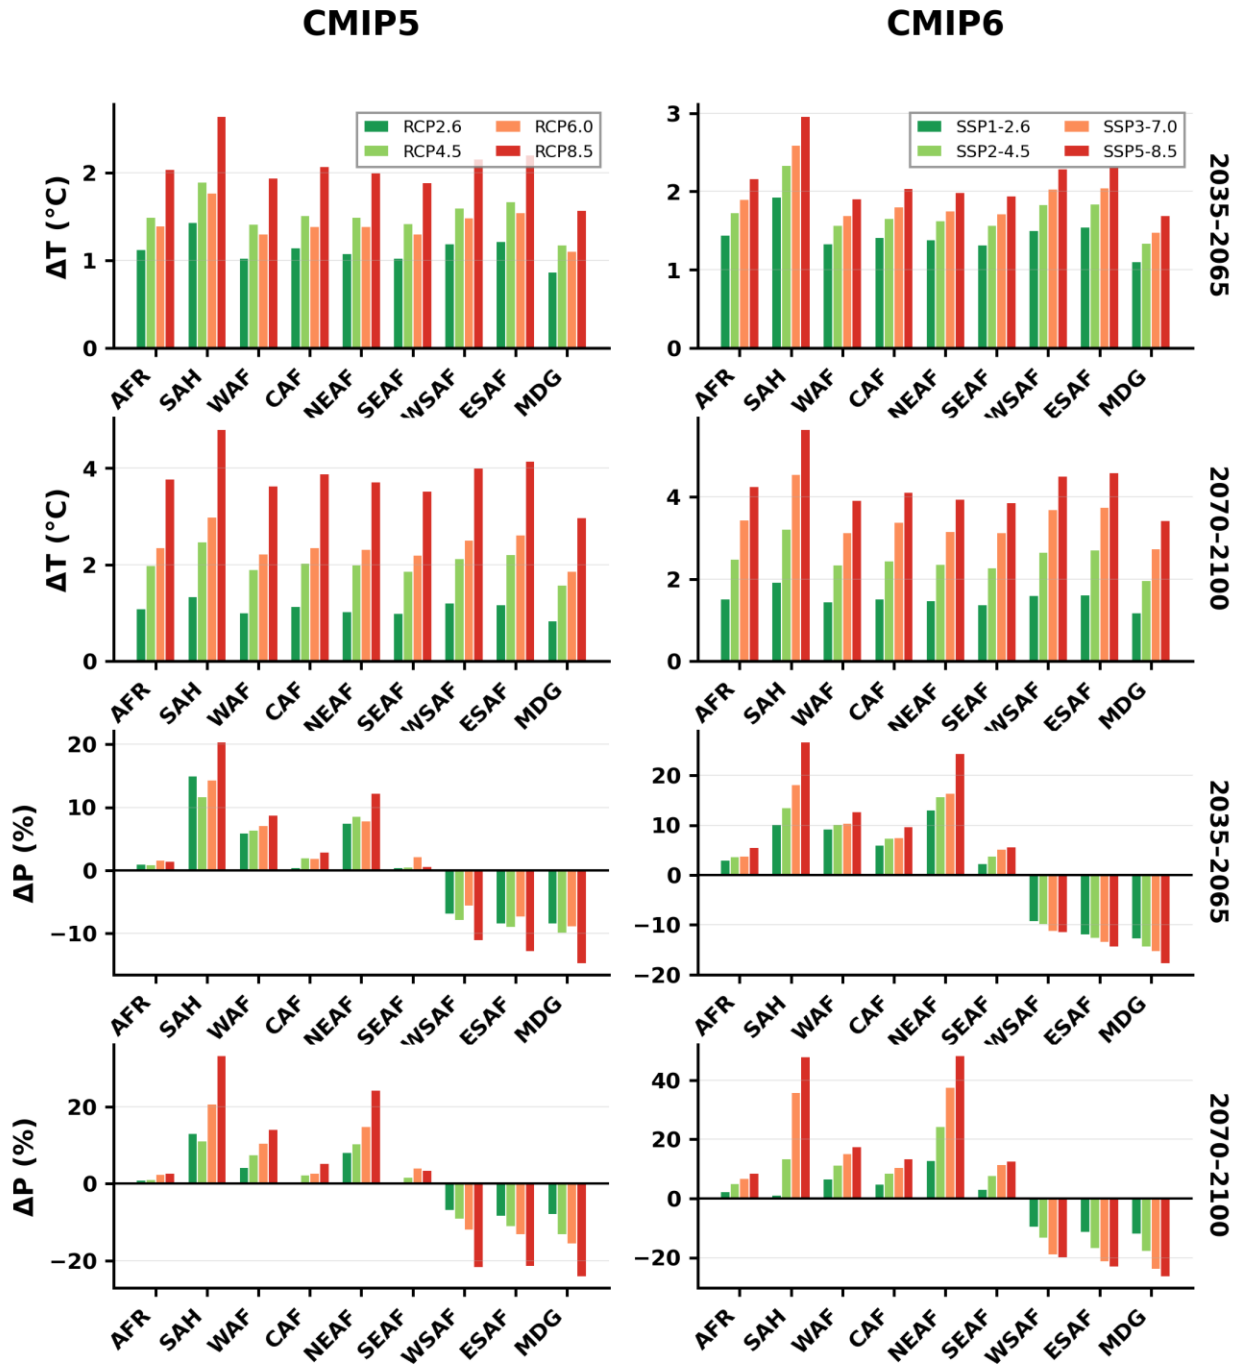

Figure S8: Projected regional mean temperature and precipitation changes across African IPCC reference regions under CMIP5 and CMIP6 emission scenarios for the SON season. Layout as in Figure 2.

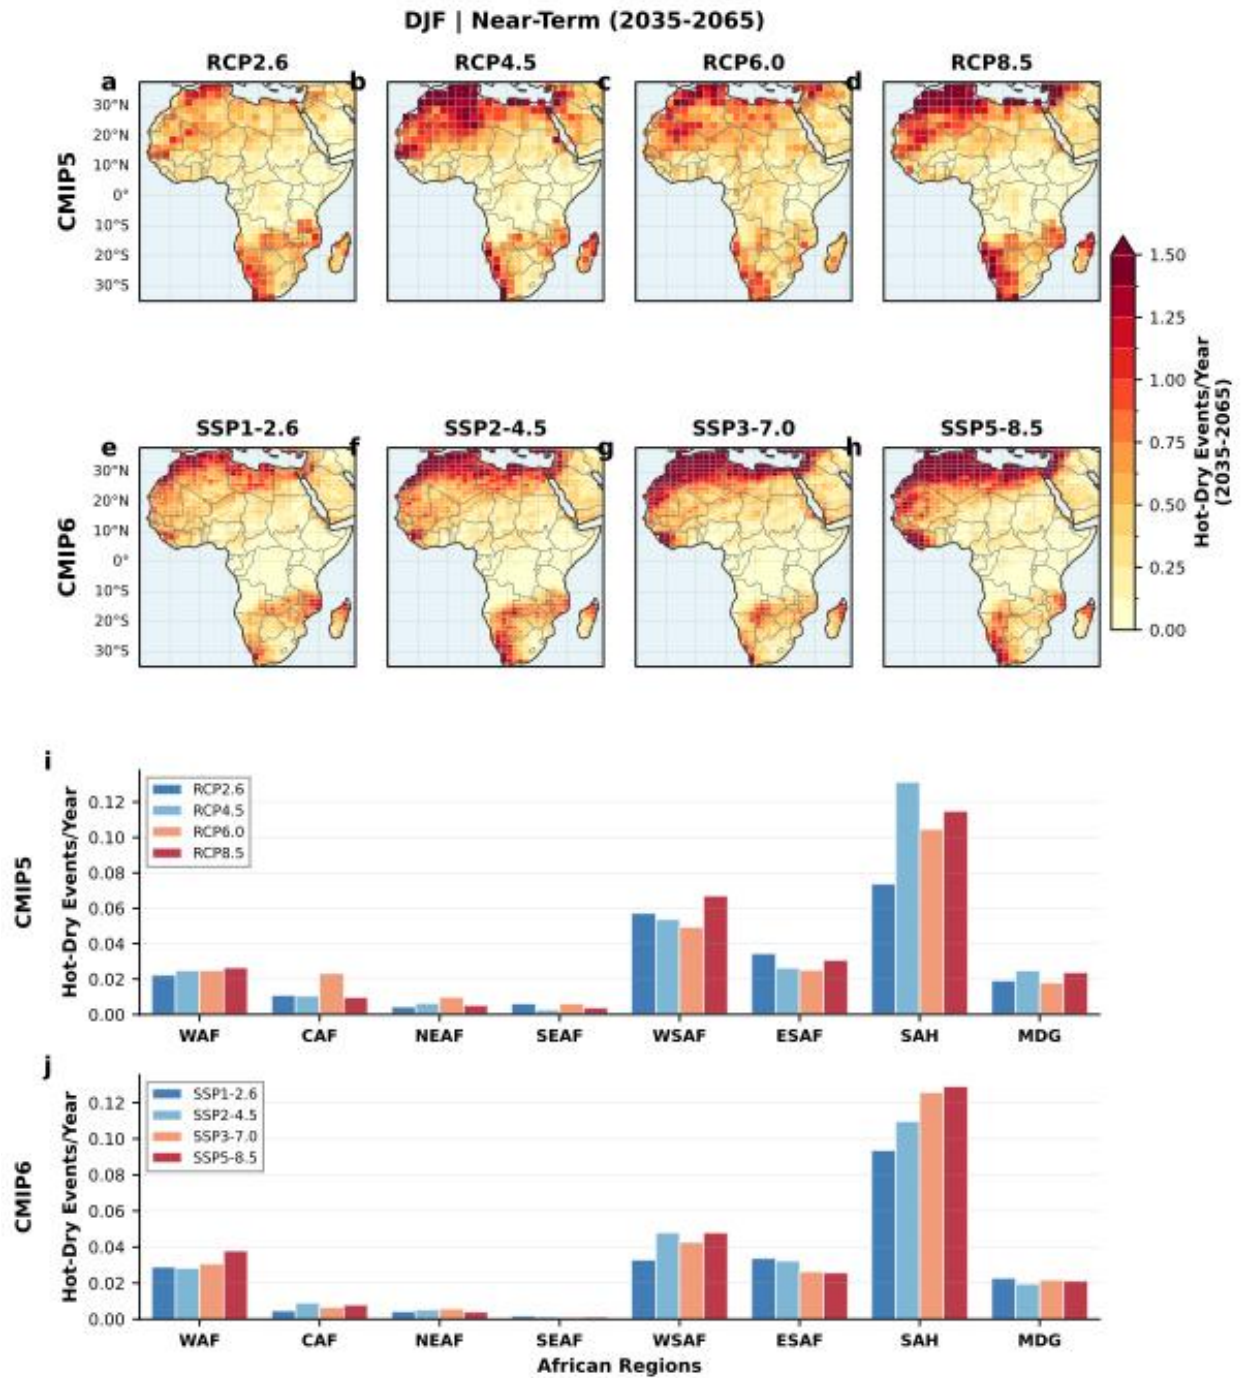

Figure S9: Projected frequency of compound hot-dry extremes across Africa for the near-term period (2035–2065) during the DJF season. Layout as in Figure 3.

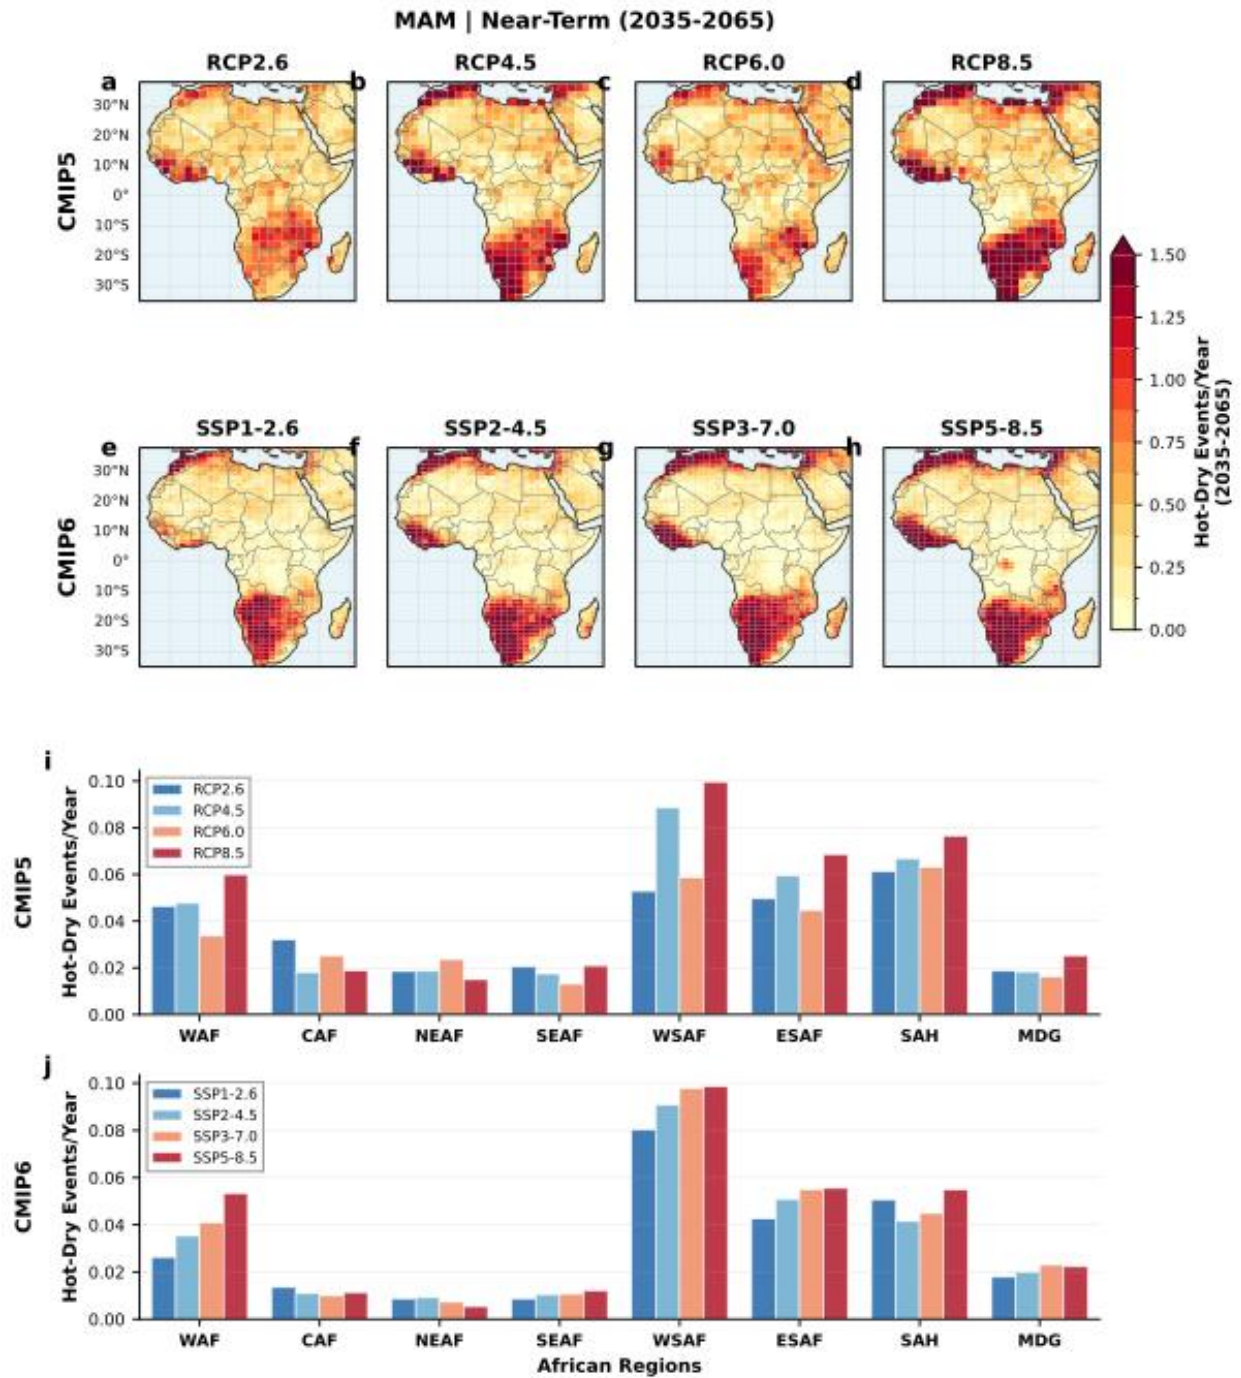

Figure S10: Projected frequency of compound hot-dry extremes across Africa for the near-term period (2035–2065) during the MAM season. Layout as in Figure 3.

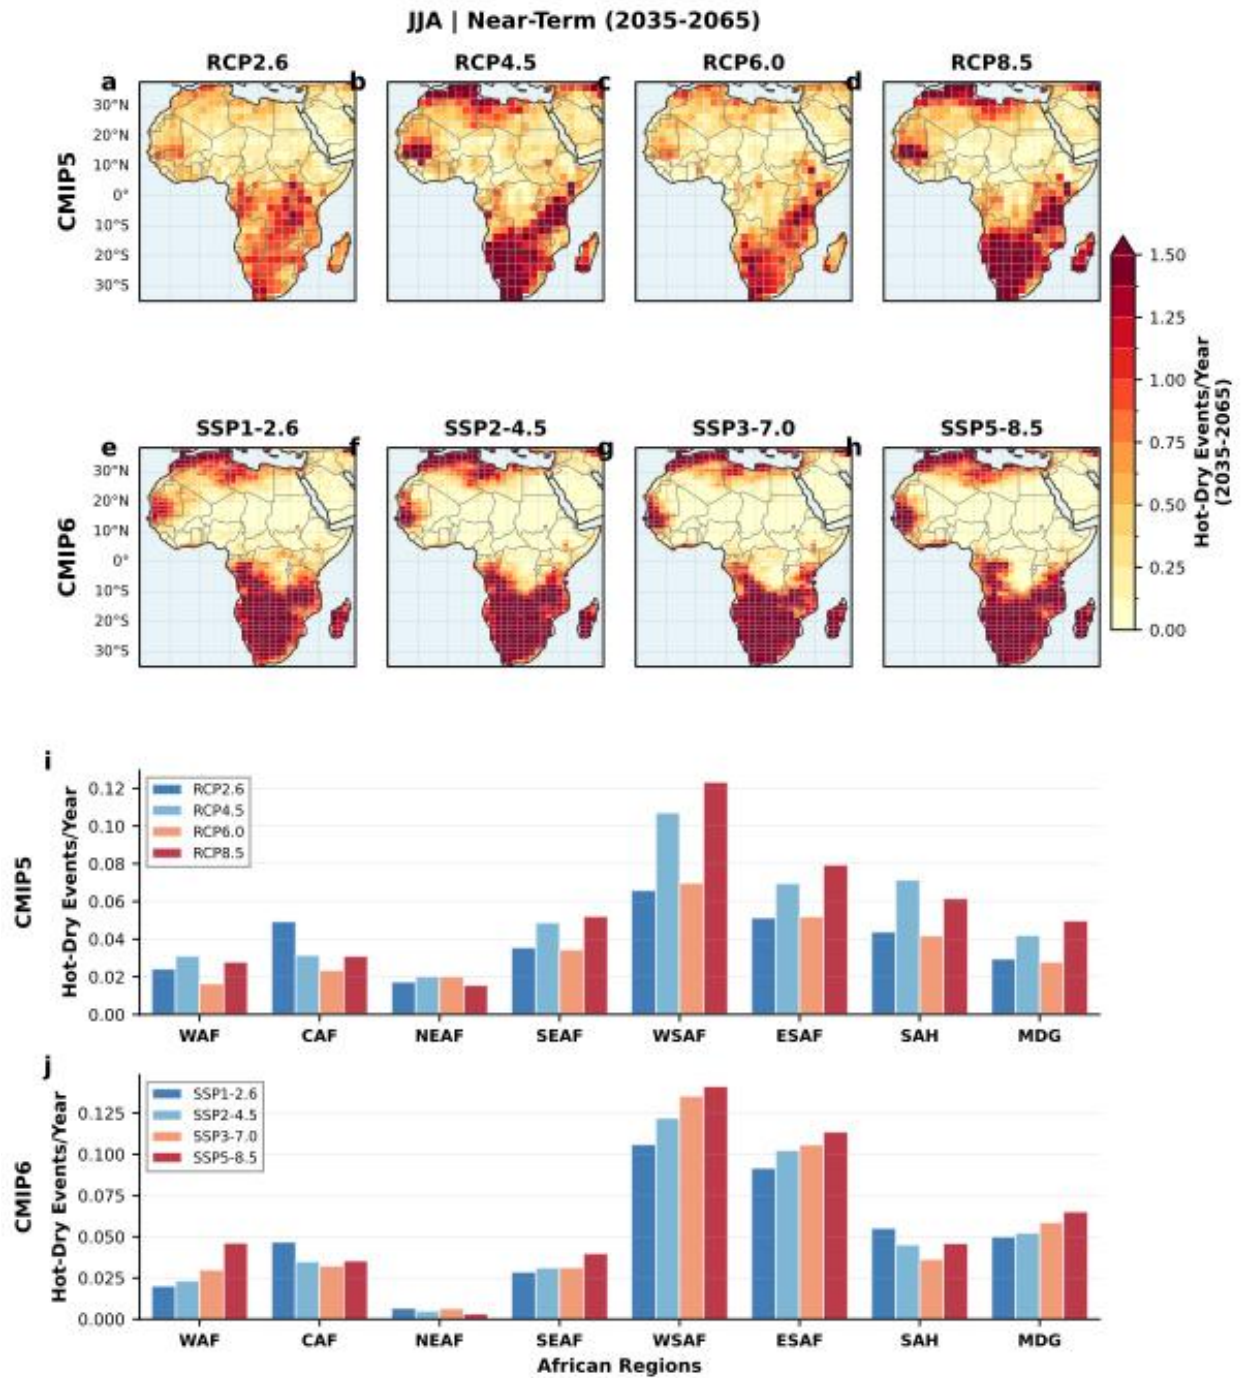

Figure S11: Projected frequency of compound hot-dry extremes across Africa for the near-term period (2035–2065) during the JJA season. Layout as in Figure 3.

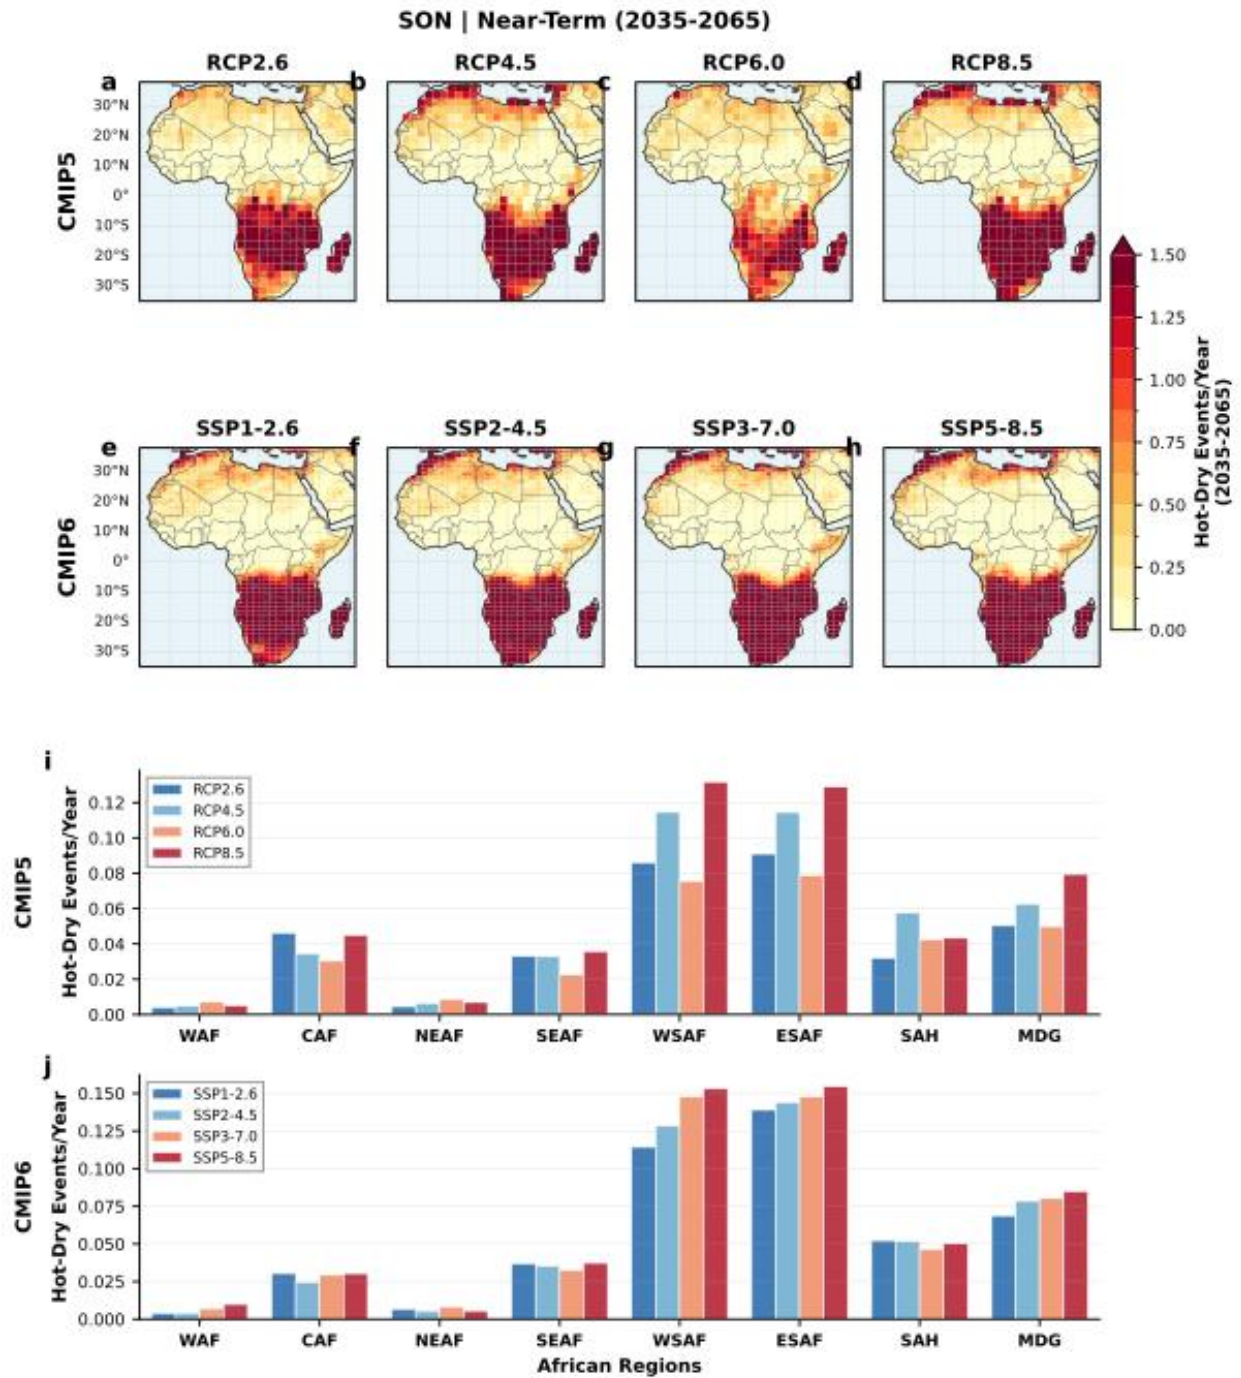

Figure S12: Projected frequency of compound hot-dry extremes across Africa for the near-term period (2035–2065) during the SON season. Layout as in Figure 3.

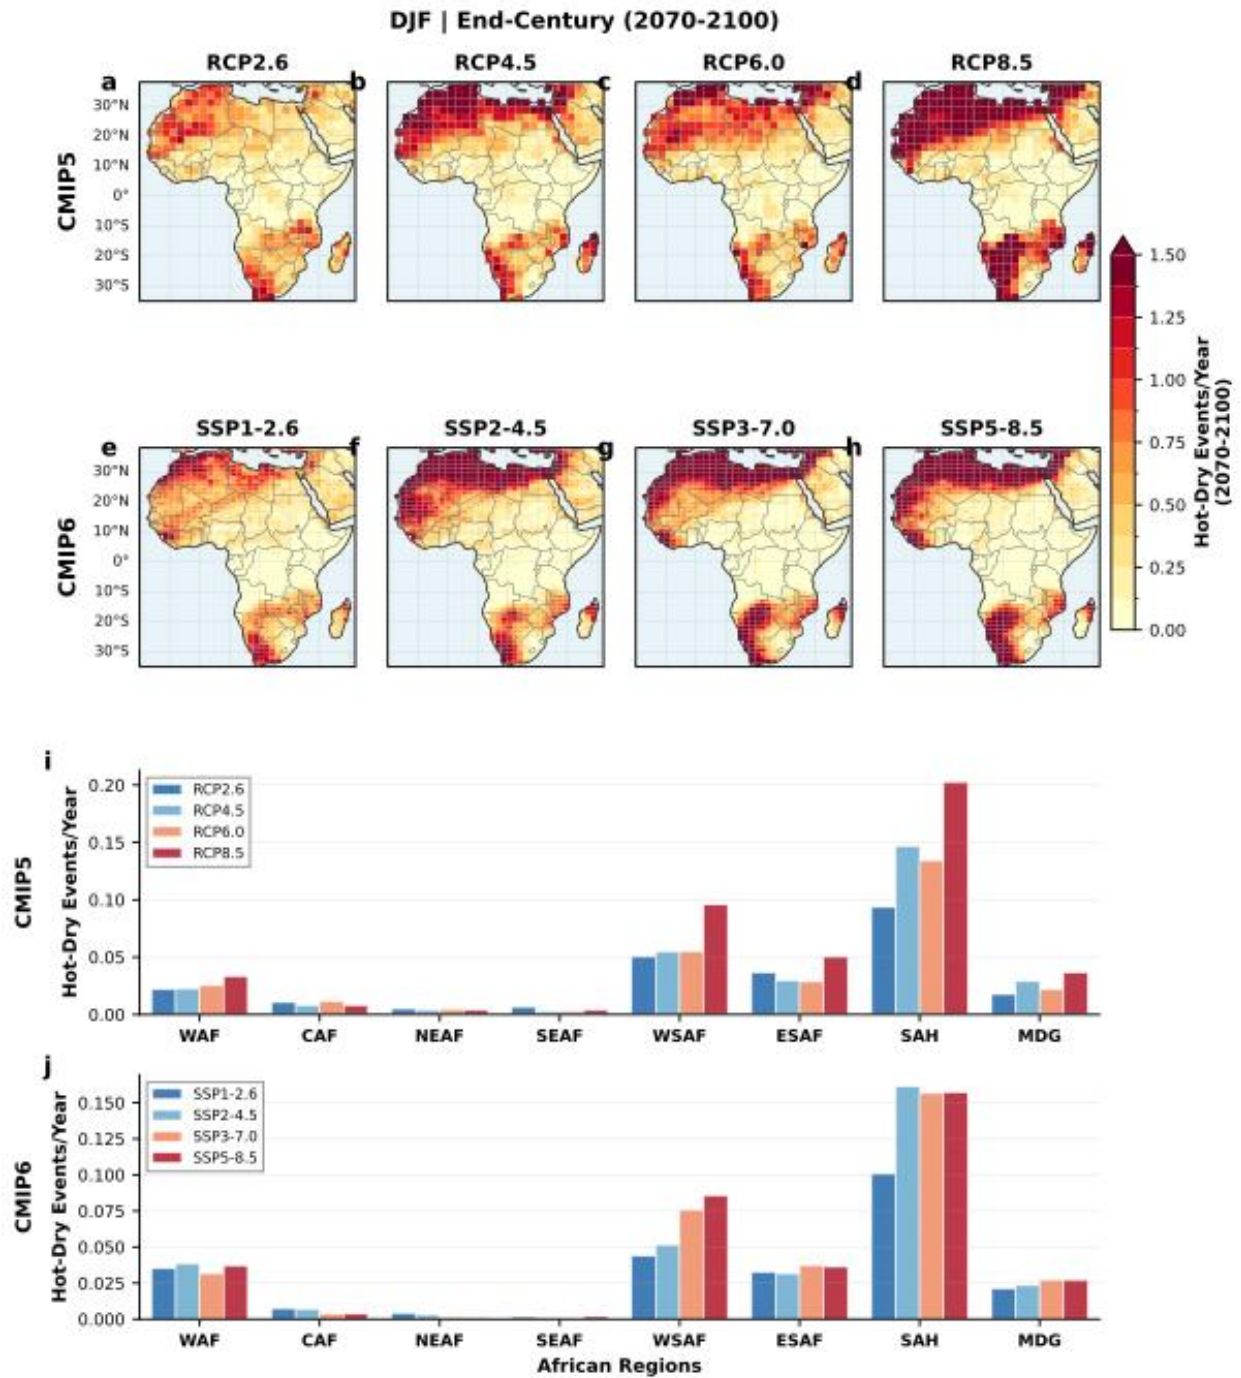

Figure S13: Projected frequency of compound hot-dry extremes across Africa for the near-term period (2070–2100) during the DJF season. Layout as in Figure 4.

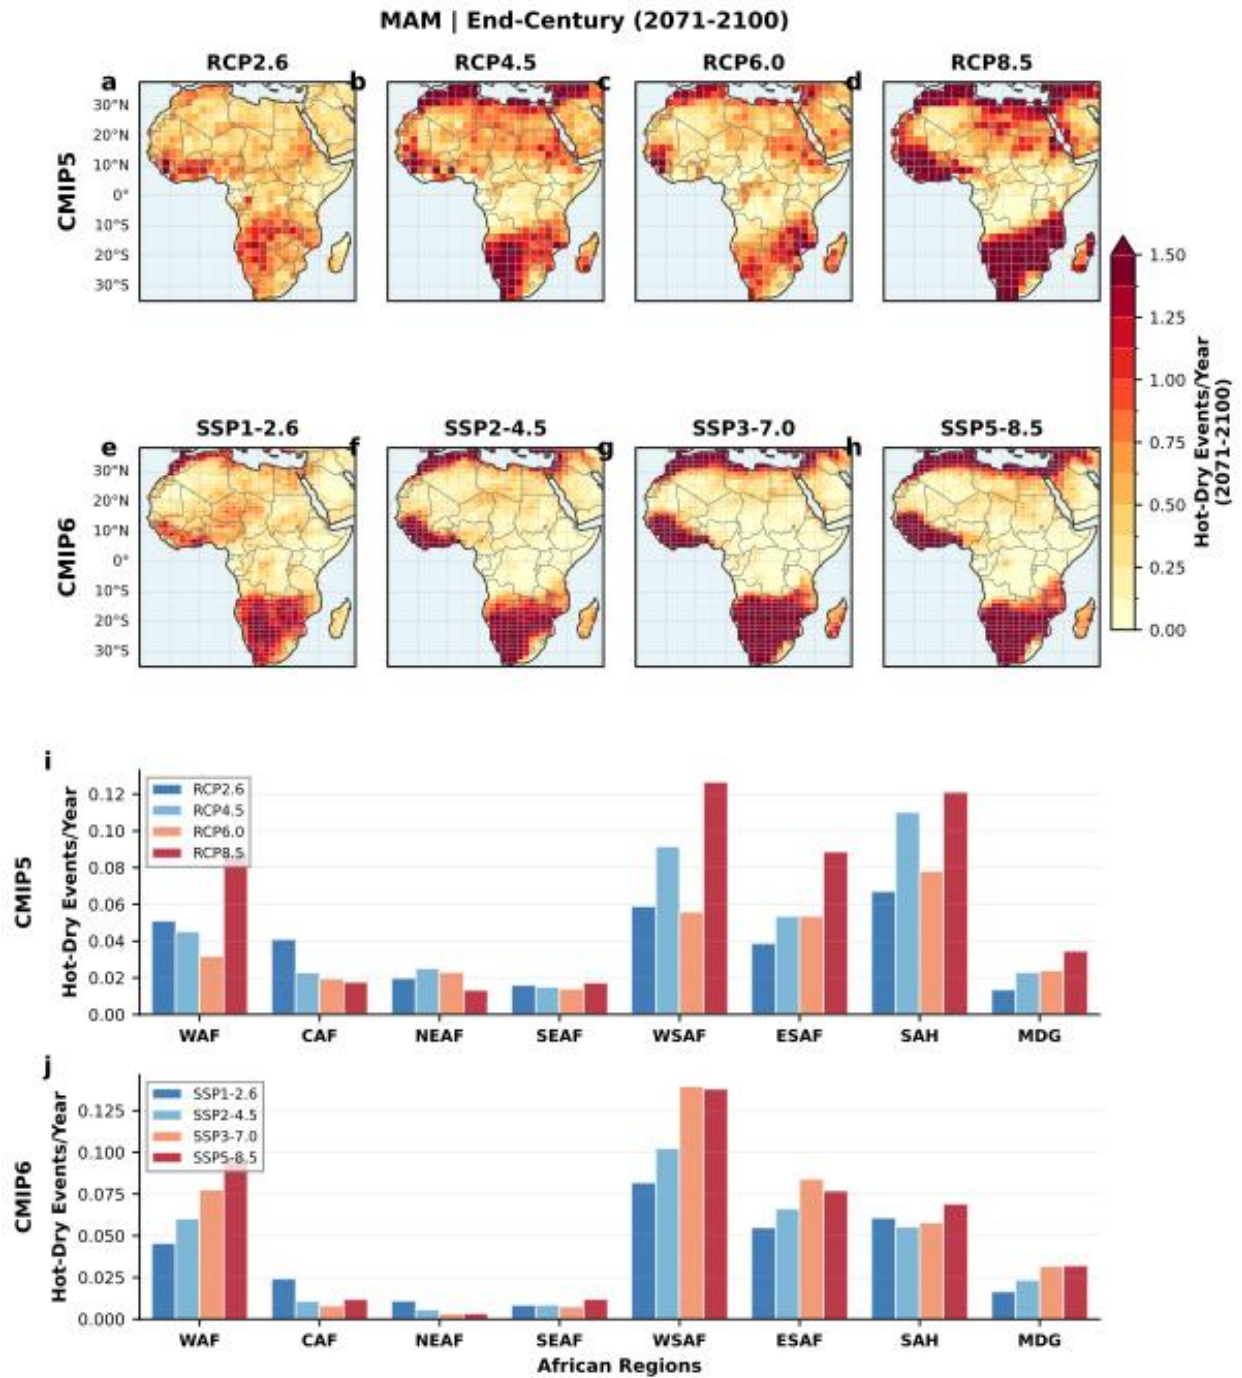

Figure S14: Projected frequency of compound hot-dry extremes across Africa for the near-term period (2070–2100) during the MAM season. Layout as in Figure 4.

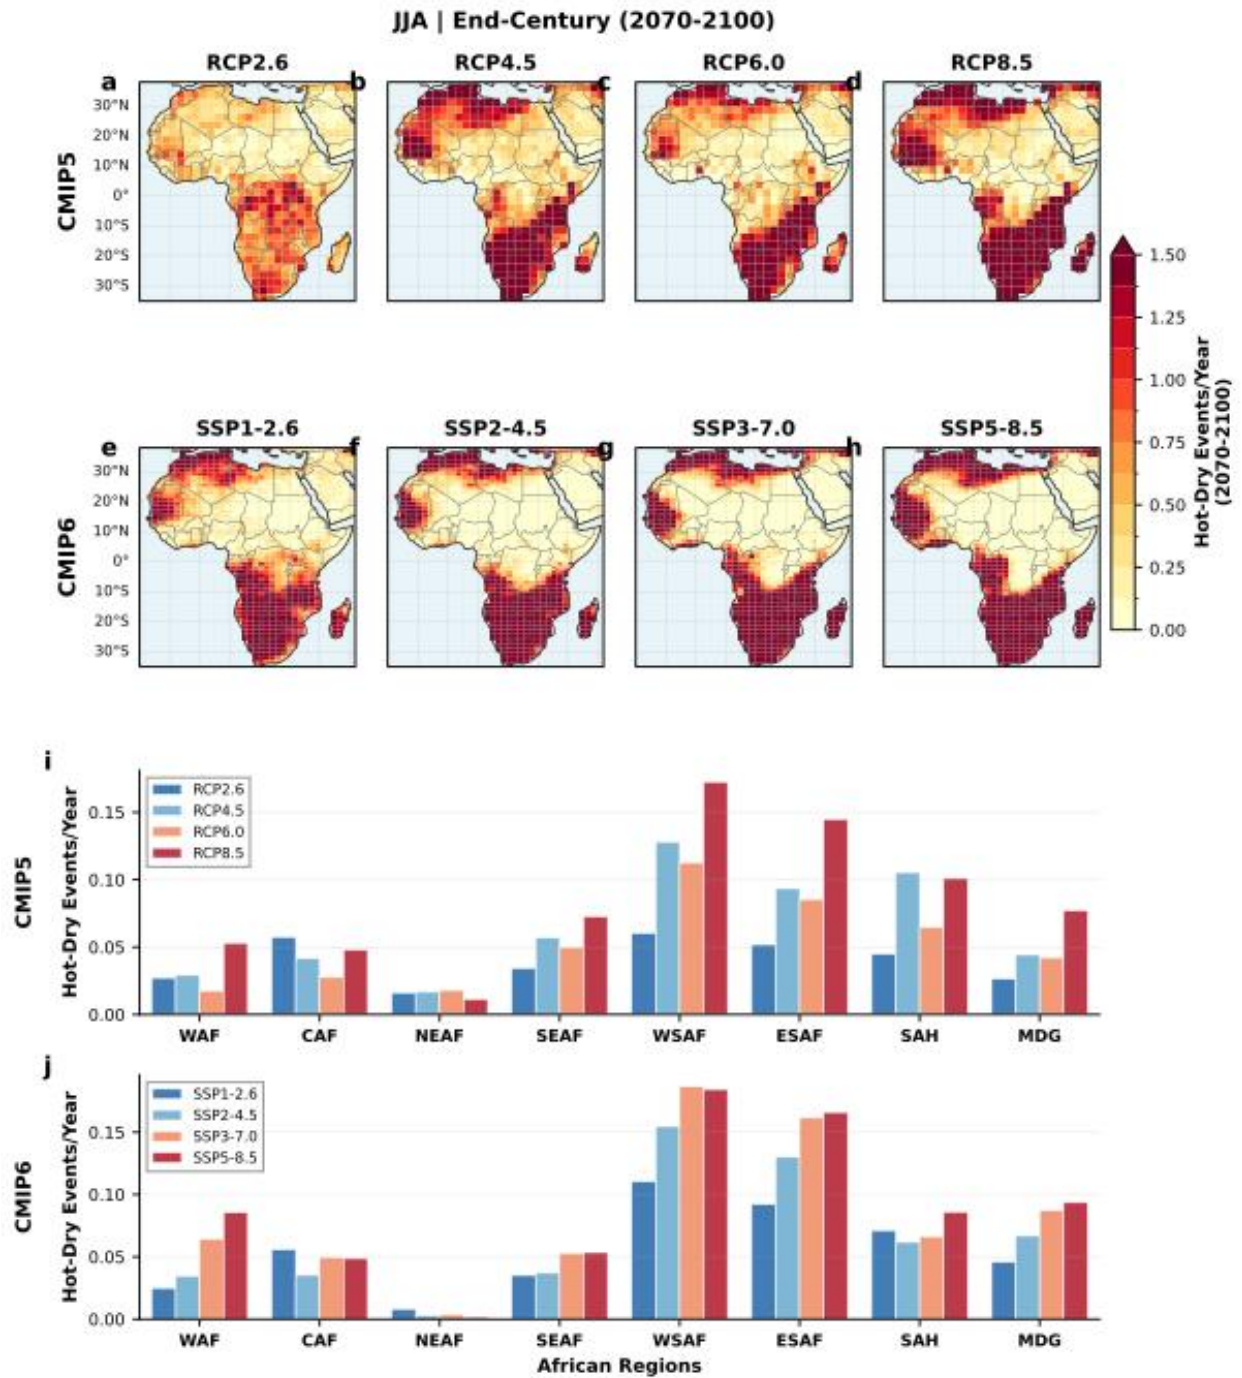

Figure S15: Projected frequency of compound hot-dry extremes across Africa for the near-term period (2070–2100) during the JJA season. Layout as in Figure 4.

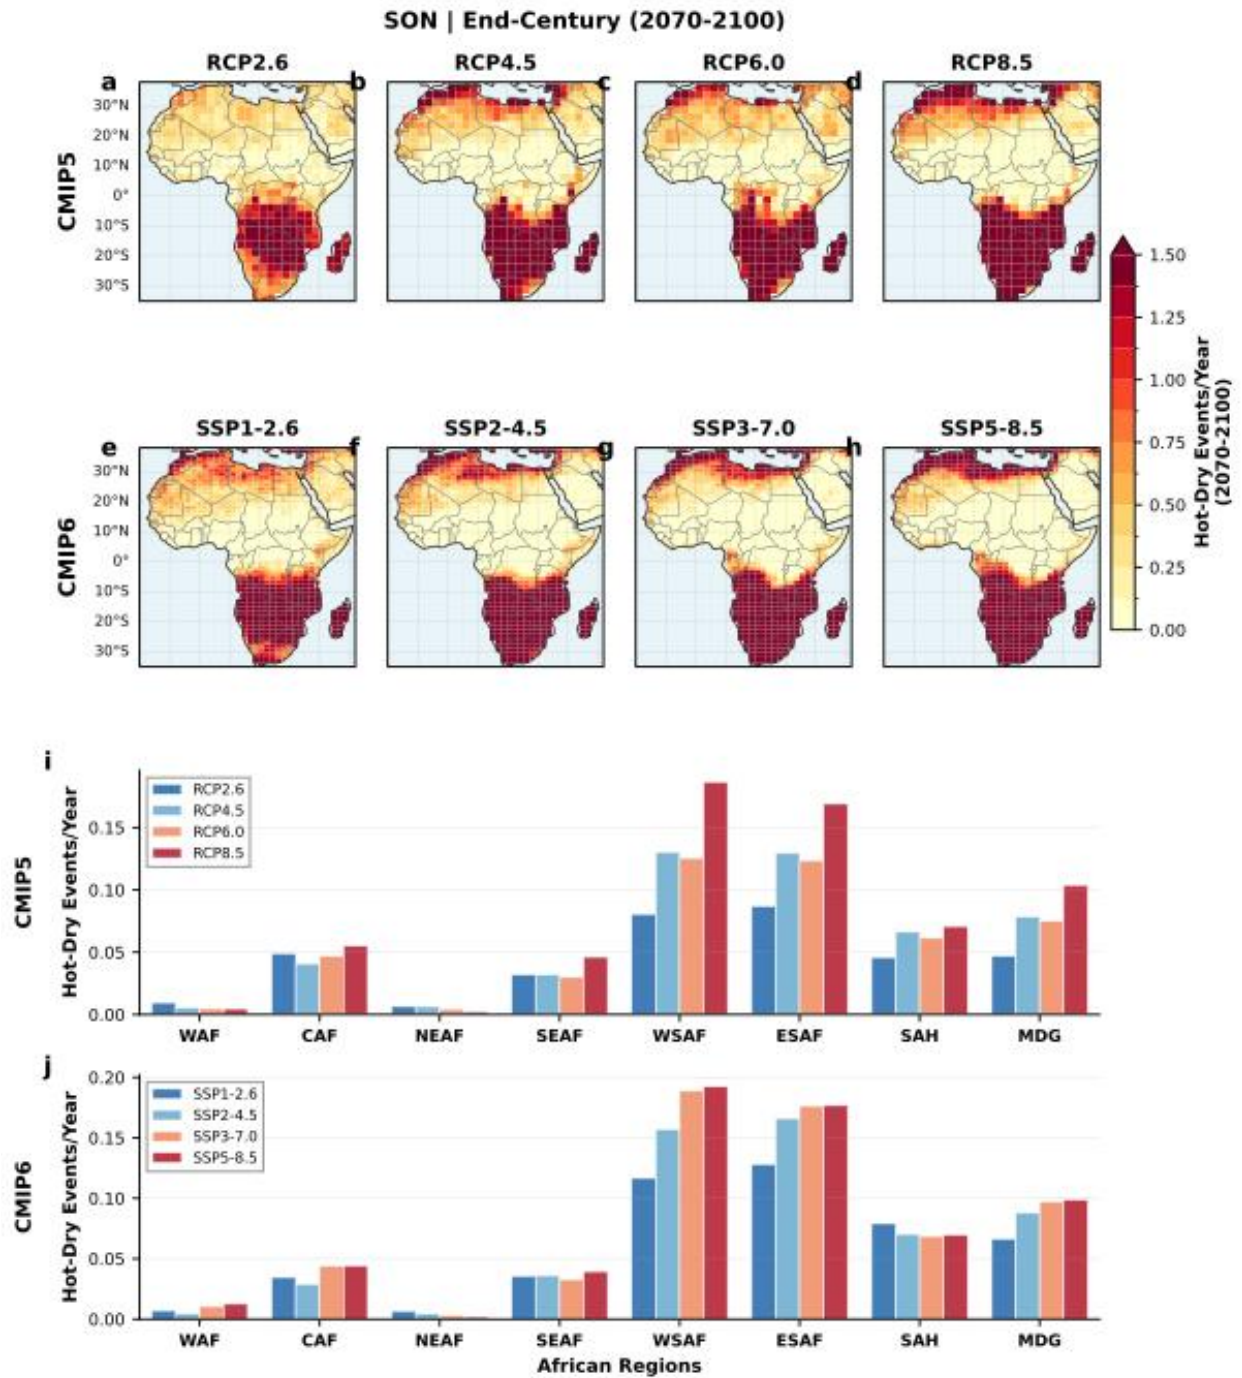

Figure S16: Projected frequency of compound hot-dry extremes across Africa for the near-term period (2070–2100) during the SON season. Layout as in Figure 4.

**Table S1:** List of CMIP5 Models and Their Developing Institutions/Groups used in the current study

| No. | Model Name     | Institution/Group            |
|-----|----------------|------------------------------|
| 1   | ACCESS1-0      | CSIRO-BOM, Australia         |
| 2   | ACCESS1-3      | CSIRO-BOM, Australia         |
| 3   | bcc-csm1-1     | BCC, China                   |
| 4   | BNU-ESM        | BNU, China                   |
| 5   | CanESM2        | CCCma, Canada                |
| 6   | CCSM4          | NCAR, USA                    |
| 7   | CESM1-BGC      | NSF-DOE-NCAR, USA            |
| 8   | CESM1-CAM5     | NSF-DOE-NCAR, USA            |
| 9   | CMCC-CM        | CMCC, Italy                  |
| 10  | CMCC-CM5       | CMCC, Italy                  |
| 11  | CNRM-CM5       | CNRM-CERFACS, France         |
| 12  | CSIRO-Mk3-6-0  | CSIRO-QCCCE, Australia       |
| 13  | EC-EARTH       | EC-EARTH consortium          |
| 14  | FGOALS-g2      | LASG-CESS, China             |
| 15  | FIO-ESM        | FIO, China                   |
| 16  | GFDL-CM3       | NOAA GFDL, USA               |
| 17  | GFDL-ESM2G     | NOAA GFDL, USA               |
| 18  | GFDL-ESM2M     | NOAA GFDL, USA               |
| 19  | GISS-E2-H      | NASA GISS, USA               |
| 20  | GISS-E2-R      | NASA GISS, USA               |
| 21  | HadGEM2-AO     | NIMR/KMA, Korea              |
| 22  | HadGEM2-CC     | Met Office Hadley Centre, UK |
| 23  | HadGEM2-ES     | Met Office Hadley Centre, UK |
| 24  | inmcm4         | INM, Russia                  |
| 25  | IPSL-CM5A-LR   | IPSL, France                 |
| 26  | IPSL-CM5A-MR   | IPSL, France                 |
| 27  | IPSL-CM5B-LR   | IPSL, France                 |
| 28  | MIROC5         | MIROC, Japan                 |
| 29  | MIROC-ESM      | MIROC, Japan                 |
| 30  | MIROC-ESM-CHEM | MIROC, Japan                 |
| 31  | MPI-ESM-LR     | MPI-M, Germany               |
| 32  | MPI-ESM-MR     | MPI-M, Germany               |
| 33  | MRI-CGCM3      | MRI, Japan                   |
| 34  | NorESM1-M      | NCC, Norway                  |
| 35  | NorESM1-ME     | NCC, Norway                  |

**Table S2:** List of CMIP6 Models and Their Developing Institutions/Groups used in the current study

| No. | Model Name         | Institution/Group            |
|-----|--------------------|------------------------------|
| 1   | ACCESS-CM2         | CSIRO-ARCCSS, Australia      |
| 2   | ACCESS-ESM1-5      | CSIRO, Australia             |
| 3   | AWI-CM-1-1-MR      | AWI, Germany                 |
| 4   | BCC-CSM2-MR        | BCC, China                   |
| 5   | CESM2              | NCAR, USA                    |
| 6   | CESM2-WACCM        | NCAR, USA                    |
| 7   | CIESM              | THU, China                   |
| 8   | CMCC-CM2-SR5       | CMCC, Italy                  |
| 9   | CNRM-CM6-1-f2      | CNRM-CERFACS, France         |
| 10  | CNRM-CM6-1-HR-f2   | CNRM-CERFACS, France         |
| 11  | CNRM-ESM2-1-f2     | CNRM-CERFACS, France         |
| 12  | CanESM5            | CCCma, Canada                |
| 13  | CanESM5-CanOE-p2   | CCCma, Canada                |
| 14  | EC-Earth3          | EC-EARTH consortium          |
| 15  | EC-Earth3-Veg      | EC-EARTH consortium          |
| 16  | FGOALS-f3-L        | CAS, China                   |
| 17  | FGOALS-g3          | CAS, China                   |
| 18  | GFDL-ESM4          | NOAA GFDL, USA               |
| 19  | GISS-E2-1-G-p3     | NASA GISS, USA               |
| 20  | HadGEM3-GC31-LL-f3 | Met Office Hadley Centre, UK |
| 21  | INM-CM4-8          | INM, Russia                  |
| 22  | INM-CM5-0          | INM, Russia                  |
| 23  | IPSL-CM6A-LR       | IPSL, France                 |
| 24  | KACE-1-0-G         | NIMS-KMA, Korea              |
| 25  | MIROC6             | MIROC, Japan                 |
| 26  | MIROC-ES2L-f2      | MIROC, Japan                 |
| 27  | MPI-ESM1-2-HR      | MPI-M, Germany               |
| 28  | MPI-ESM1-2-LR      | MPI-M, Germany               |
| 29  | MRI-ESM2-0         | MRI, Japan                   |
| 30  | NESM3              | NUIST, China                 |
| 31  | NorESM2-LM         | NCC, Norway                  |
| 32  | NorESM2-MM         | NCC, Norway                  |
| 33  | UKESM1-0-LL-f2     | Met Office Hadley Centre, UK |
